# Supplementary material for: Circular RNAs as a potential source of neoepitopes in cancer
Source: PubMed Central journal article supplement (PMC10130363; doi:10.3389/fonc.2023.1098523), 2023-04-12
Supplement: Image_1.pdf [file Image_1.pdf]

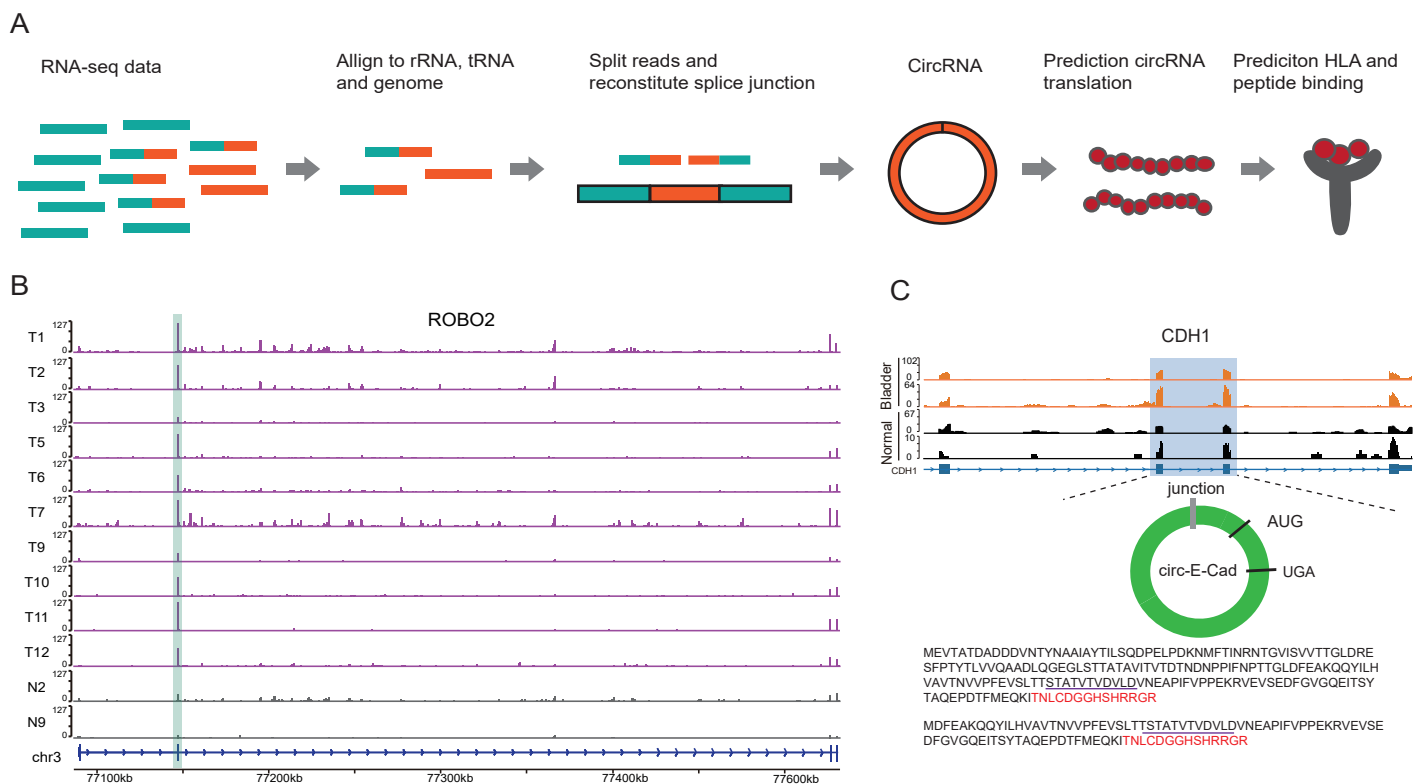

**Supplementary Figure 1. The workflow for the identification of neoepitopes using CIRC-neo.**

(A) Flowcharts for the number of circRNA or circRNA-derived neoepitope peptides identified at each stage of the analysis. (B) The second exon of ROBO2 forming the circRNA track. Purple represents the GBM samples and gray represents the normal samples. (C) The novel proteins and neoepitopes generated from circ-E-Cad. The red letters represent the novel peptide sequences while the purple lines represent HLA class I-binding neoepitopes.
