# Supplementary material for: Circular RNAs as a potential source of neoepitopes in cancer
Source: PubMed Central journal article supplement (PMC10130363; doi:10.3389/fonc.2023.1098523), 2023-04-12
Supplement: Image_2.pdf [file Image_2.pdf]

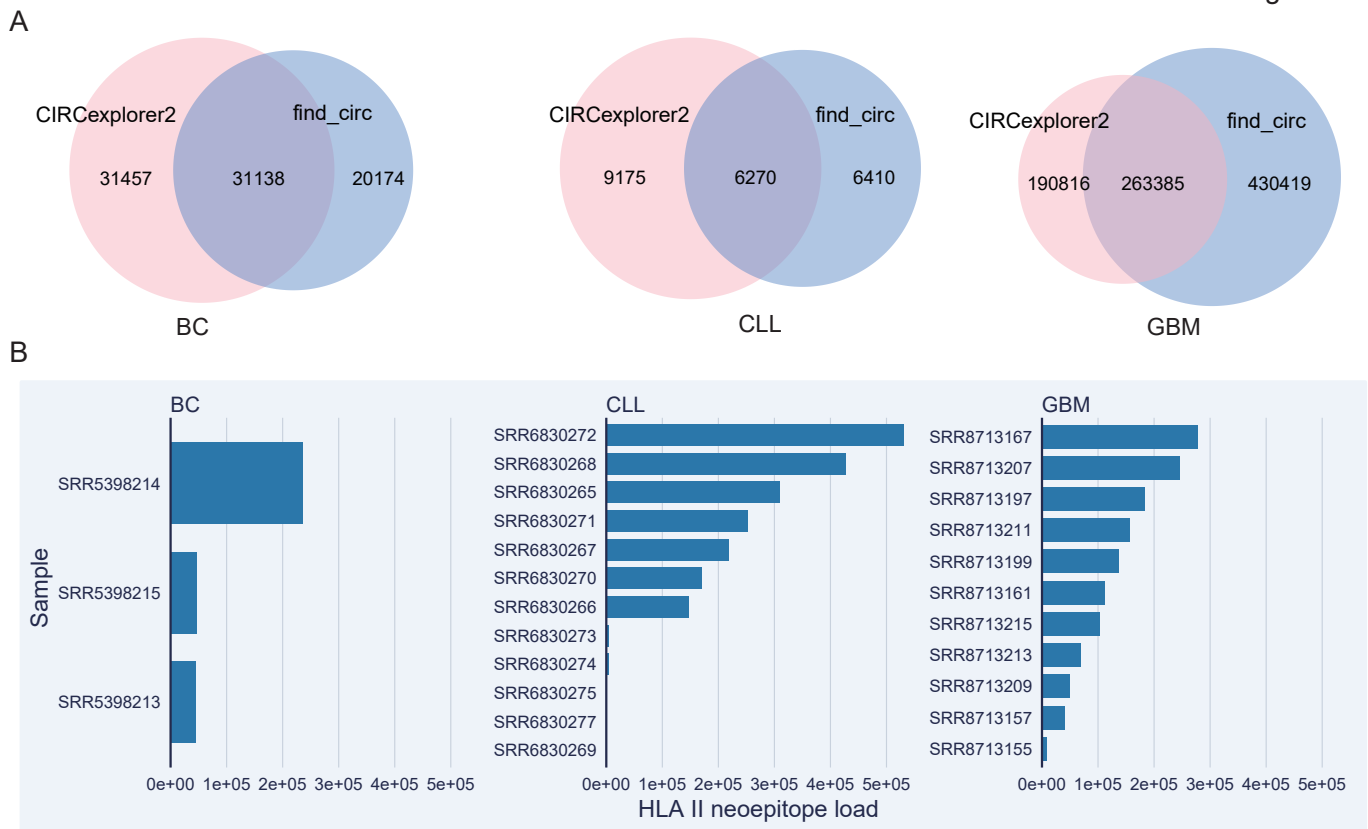

**Supplementary Figure 2. The circRNA and HLA class II-binding neopeptides load in BC, CLL, and GBM. (A)** The overlap of the predicted results between find\_circ and CIRCexplorer2 in BC, CLL, and GBM. **(B)** The HLA class II-binding neopeptide load in BC, CLL, and GBM.
