# Supplementary material for: Circular RNAs as a potential source of neoepitopes in cancer
Source: PubMed Central journal article supplement (PMC10130363; doi:10.3389/fonc.2023.1098523), 2023-04-12
Supplement: Image_3.pdf [file Image_3.pdf]

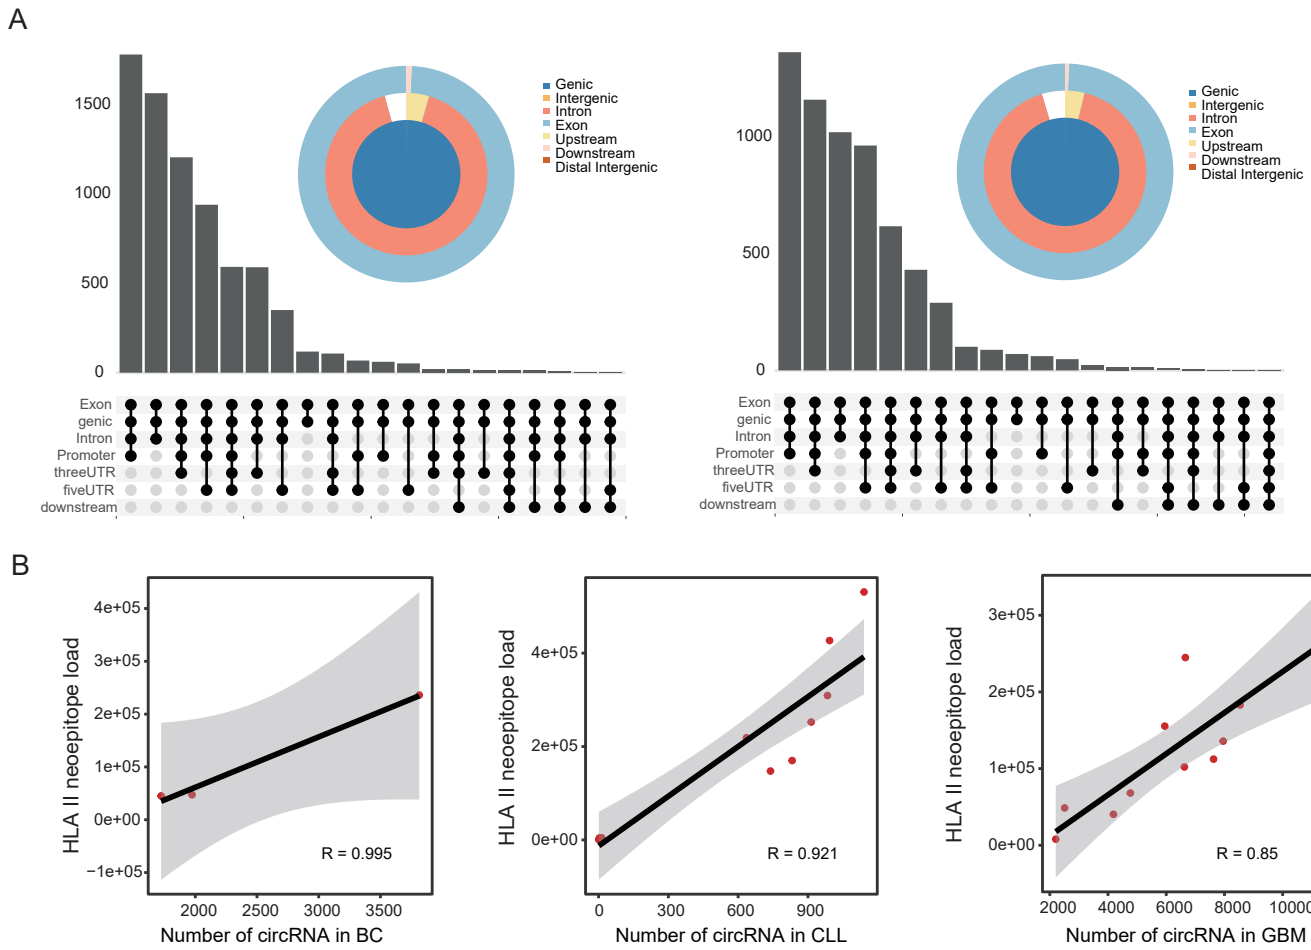

**Supplementary Figure 3. The estimates for the circRNA and circRNA-derived neopeptide loads. (A) The genomic location type of circRNAs in BC and CLL. (B) Correlations between the number of circRNAs and the HLA class II-binding neopeptide load.**
